# Supplementary material for: Dietary Patterns and the Double Burden of Malnutrition in Mexican Adolescents: Results from ENSANUT-2006
Source: PubMed Central journal article supplement (PMC6893405; doi:10.3390/nu11112753), 2019-11-13
Supplement: nutrients-11-02753-s001.pdf [file nutrients-11-02753-s001.pdf]

Supplementary Table S1: Food groups, examples of food items and percentage of consumers per food group.

| Food group                          | Examples                                                                                                                   | % consumers |
|-------------------------------------|----------------------------------------------------------------------------------------------------------------------------|-------------|
| 1. Tortilla                         | Maize tortilla                                                                                                             | 90.2        |
| 2. Cereals (except corn)            | Potatoes, bread, wheat tortilla, salty cookie                                                                              | 63.6        |
| 3. Breakfast cereals                | Breakfast cereals with low and high fiber content                                                                          | 30.1        |
| 4. Maize based food                 | Tamales, pozole, taco, tlacoyo, sope, atole (maize-drink)                                                                  | 49.1        |
| 5. Fast food                        | Hotdog, pizza, hamburger                                                                                                   | 13.1        |
| 6. Alcoholic drinks                 | Beer, wine, spirits                                                                                                        | 4.2         |
| 7. Legumes                          | Beans, lentils, chick peas, soy                                                                                            | 90.0        |
| 8. Fruit                            | Apple, banana, grapes, grapefruit, kiwi, lemon, melon, papaya, pear, pineapple, strawberry, watermelon, others.            | 93.3        |
| 9. Vegetables                       | Bell pepper, carrots, chili pepper, col, corn, cucumber, dark green vegetables, jicama, lettuce, tomato, zucchini, others. | 97.6        |
| 10. Poultry and red meat            | Chicken, beef, pork, lamb, entrails                                                                                        | 86.4        |
| 11. Fish and sea food               | Tuna, sardines, dry fish, fresh fish, sea food                                                                             | 34.4        |
| 12. Processed meat                  | Ham, sausages, bacon, chorizo                                                                                              | 45.5        |
| 13. Milk                            | Fat free and low fat milk, whole milk                                                                                      | 68.5        |
| 14. Eggs                            |                                                                                                                            | 75.8        |
| 15. Saturated fat                   | Oil, butter, margarine, mayonnaise, cream                                                                                  | 34.2        |
| 16. Sugar and sweets                | Sugar, candies, chocolate, jelly                                                                                           | 74.3        |
| 17. Cookies                         | Sweet cookies, granola bars                                                                                                | 32.6        |
| 18. Salty snacks                    | Corn snacks and chips                                                                                                      | 51.0        |
| 19. Industrialized sweet-drinks     | All types of soda and industrialized juice                                                                                 | 84.9        |
| 20. Non-industrialized sweet-drinks | Natural juice, water with sugar, coffee or tea with sugar                                                                  | 83.3        |
| 21. Milk with added sugar           | Milk with sugar, honey or chocolate, Yakult                                                                                | 5.9         |
| 22. Drinks without energy           | Coffee or tea without sugar, water, diet sodas                                                                             | 8.8         |
| 23. Dairy products                  | Yogurt, cheese                                                                                                             | 70.5        |
| 24. Sandwich                        | Sandwich and torta (baguette type)                                                                                         | 36.5        |
| 25. Fried dishes (plant based)      | Breaded or capped vegetables, fried banana, fried potatoes, potato-tortita                                                 | 28.5        |
| 26. Sweet-bakery                    | Cakes, sweet bread, doughnut, churros, muffin                                                                              | 60.5        |
| 27. Supplements                     | NUTRISANO and NUTRIVIDA (dietary supplements administrated by the health ministry)                                         | 0.3         |
| 28. Soups                           | Vegetable soup, vegetables cream, fideo soup                                                                               | 77.3        |
| 29. Dry soups                       | Rice, pasta                                                                                                                | 68.6        |
| 30. Avocado and nuts                | Avocado and oily seeds (nuts, almond, soy)                                                                                 | 39.0        |

Supplementary Table S2: Prevalence ratios of overweight-obesity and stunting, and dietary patterns among Mexican adolescents. Not adjusted for EI:BMR ratio

| Dietary pattern                        | Total *          | 12-15 years §<br>(n=4,451) | 16-19 years §<br>(n=2,929) | Boys ¥<br>(n=3,610) | Girls ¥<br>(n=3,770) |
|----------------------------------------|------------------|----------------------------|----------------------------|---------------------|----------------------|
| Overweight and obesity                 |                  |                            |                            |                     |                      |
| Non-traditional & breakfast/lunch-type | 1.05 (0.99-1.11) | 1.12 (1.03-1.21)           | 0.93 (0.84-1.02)           | 1.02 (0.94-1.11)    | 1.07 (0.99-1.16)     |
| Western                                | 1.05 (0.99-1.10) | 1.09 (1.01-1.17)           | 0.96 (0.88-1.06)           | 1.13 (1.04-1.24)    | 0.98 (0.90-1.06)     |
| Plant-based                            | 0.95 (0.90-1.00) | 0.96 (0.89-1.04)           | 0.93 (0.85-1.02)           | 0.96 (0.88-1.04)    | 0.95 (0.88-1.02)     |
| Protein-rich                           | 0.94 (0.89-0.99) | 0.92 (0.86-0.98)           | 0.98 (0.88-1.08)           | 0.99 (0.90-1.09)    | 0.90 (0.83-0.97)     |
| Stunting                               |                  |                            |                            |                     |                      |
| Non-traditional & breakfast/lunch-type | 0.86 (0.79-0.94) | 0.87 (0.78-0.98)           | 0.85 (0.76-0.94)           | 0.87 (0.80-0.95)    | 0.86 (0.75-0.97)     |
| Western                                | 0.91 (0.84-0.98) | 0.94 (0.85-1.04)           | 0.89 (0.79-0.99)           | 0.90 (0.81-1.01)    | 1.01 (0.91-1.11)     |
| Plant-based                            | 0.95 (0.90-1.00) | 0.96 (0.89-1.04)           | 0.93 (0.85-1.02)           | 0.96 (0.88-1.04)    | 0.90 (0.83-0.98)     |
| Protein-rich                           | 1.01 (0.95-1.07) | 0.98 (0.90-1.08)           | 1.03 (0.95-1.12)           | 1.05 (0.95-1.16)    | 1.05 (0.95-1.17)     |

\* Model adjusted for sex, living area, socioeconomic status, region, age § Model adjusted for sex, living area, socioeconomic status, region and ¥ Model adjusted for living area, socioeconomic status, region, age. None of the Prevalence Ratios were adjusted for EI:BMR ratio, for adjusted prevalence ratios see

Table 4 and 6.

Supplementary Table S3: Total energy and nutrient intake across quartiles (Q) of the four dietary patterns.

|                                                   | Quartile of dietary pattern score |                                  |                                  |                                  | <i>p</i> -value |
|---------------------------------------------------|-----------------------------------|----------------------------------|----------------------------------|----------------------------------|-----------------|
|                                                   | Q <sub>1</sub>                    | Q <sub>2</sub>                   | Q <sub>3</sub>                   | Q <sub>4</sub>                   |                 |
| <b>Non-traditional &amp; breakfast/lunch-type</b> |                                   |                                  |                                  |                                  |                 |
| EI:BMR ratio (SD)                                 | 1.08 (0.42) <sup>2,3,4</sup>      | 0.85 (0.37) <sup>1,4</sup>       | 0.88 (0.37) <sup>1,4</sup>       | 1.01 (0.40) <sup>1,2,3</sup>     | <0.0001         |
| Energy kcal (SD)                                  | 2035.1 (805.4) <sup>2,3,4</sup>   | 1602.8 (688.0) <sup>1,4</sup>    | 1627.6 (711.1) <sup>1,4</sup>    | 1935.5 (774.6) <sup>1,2,3</sup>  | <0.0001         |
| Protein % (SD)                                    | 10.4 (1.7) <sup>2,3,4</sup>       | 10.7 (2.1) <sup>1,3,4</sup>      | 11.6 (2.2) <sup>1,2,4</sup>      | 12.6 (2.4) <sup>1,2,3</sup>      | <0.0001         |
| Fat % (SD)                                        | 22.3 (8.2) <sup>2,4</sup>         | 24.9 (7.7) <sup>1,3,4</sup>      | 27.7 (7.1) <sup>2,4</sup>        | 29.6 (6.3) <sup>1,2,3</sup>      | <0.0001         |
| Carbohydrates % (SD)                              | 67.2 (8.8) <sup>2,3,4</sup>       | 64.1 (8.6) <sup>1,4</sup>        | 60.6 (8.2) <sup>1,4</sup>        | 57.7 (7.7) <sup>1,2,3</sup>      | <0.0001         |
| Fiber g (SD)                                      | 27.3 (12.3) <sup>2,3,4</sup>      | 19.4 (9.1) <sup>1,3,4</sup>      | 17.4 (9.4) <sup>1,2</sup>        | 18.4 (9.5) <sup>1,2</sup>        | <0.0001         |
| Sugar g (SD)                                      | 13.7 (20.0) <sup>3,4</sup>        | 13.5 (20.2) <sup>3,4</sup>       | 16.5 (22.8) <sup>1,2,4</sup>     | 21.2 (23.9) <sup>1,2,3</sup>     | <0.0001         |
| Ca mg (SD)                                        | 885.2 (450.4) <sup>2,3,4</sup>    | 677.9 (364.6) <sup>1,3,4</sup>   | 731.3 (388.0) <sup>1,2,4</sup>   | 1075.7 (472.4) <sup>1,2,3</sup>  | <0.0001         |
| Fe mg (SD)                                        | 13.7 (5.8) <sup>2,3,4</sup>       | 9.9 (4.9) <sup>1,4</sup>         | 9.9 (5.2) <sup>1,4</sup>         | 12.6 (6.2) <sup>1,2,3</sup>      | <0.0001         |
| Zn mg (SD)                                        | 7.6 (3.3) <sup>2,3,4</sup>        | 6.0 (3.2) <sup>1,3,4</sup>       | 6.5 (3.1) <sup>1,2,4</sup>       | 8.6 (3.8) <sup>1,2,3</sup>       | <0.0001         |
| Vit C mg (SD)                                     | 54.7 (78.0) <sup>2,3,4</sup>      | 60.7 (78.1) <sup>1,3,4</sup>     | 70.2 (80.1) <sup>1,2,4</sup>     | 97.0 (93.4) <sup>1,2,3</sup>     | <0.0001         |
| Vit A                                             | 2306.0 (3262.2) <sup>2,3,4</sup>  | 2642.2 (3414.9) <sup>1,3,4</sup> | 3162.8 (3542.6) <sup>1,2,4</sup> | 4928.1 (4612.2) <sup>1,2,3</sup> | <0.0001         |
| Folate                                            | 236.1 (132.2) <sup>2,3,4</sup>    | 192.7 (109.0) <sup>1,4</sup>     | 197.9 (111.2) <sup>1,3</sup>     | 249.6 (126.5) <sup>1,2,3</sup>   | <0.0001         |
| Vit B12                                           | 1.3 (1.4) <sup>2,3,4</sup>        | 1.5 (1.5) <sup>1,3,4</sup>       | 2.0 (1.5) <sup>1,2,4</sup>       | 3.2 (2.1) <sup>1,2,3</sup>       | <0.0001         |
| <b>Western</b>                                    |                                   |                                  |                                  |                                  |                 |
| EI:BMR ratio (SD)                                 | 0.85 (0.37) <sup>3,4</sup>        | 0.85 (0.35) <sup>3,4</sup>       | 0.95 (0.37) <sup>1,2,4</sup>     | 1.189 (0.42) <sup>1,2,3</sup>    | <0.0001         |
| Energy kcal (SD)                                  | 1558.5 (677.8) <sup>3,4</sup>     | 1562.8 (647.4) <sup>3,4</sup>    | 1796.4 (689.5) <sup>1,2,4</sup>  | 2301.3 (807.4) <sup>1,2,3</sup>  | <0.0001         |
| Protein % (SD)                                    | 11.2 (2.0) <sup>4</sup>           | 11.3 (2.2) <sup>4</sup>          | 11.3 (2.4) <sup>4</sup>          | 11.1 (2.4) <sup>1,2,3</sup>      | <0.0001         |
| Fat % (SD)                                        | 21.3 (7.4) <sup>2,3,4</sup>       | 25.0 (7.0) <sup>1,3,4</sup>      | 28.1 (7.4) <sup>1,2,4</sup>      | 31.1 (6.6) <sup>1,2,3</sup>      | <0.0001         |
| Carbohydrates % (SD)                              | 67.2 (8.6) <sup>2,3,4</sup>       | 63.6 (8.3) <sup>1,3,4</sup>      | 60.5 (8.4) <sup>1,2,4</sup>      | 57.6 (8.2) <sup>1,2,3</sup>      | <0.0001         |
| Fiber g (SD)                                      | 21.7 (10.97) <sup>2,3,4</sup>     | 19.4 (10.3) <sup>1,4</sup>       | 19.7 (11.0) <sup>1,4</sup>       | 20.6 (11.2) <sup>1,2,3</sup>     | <0.0001         |
| Sugar g (SD)                                      | 8.2 (13.2) <sup>2,3,4</sup>       | 13.7 (17.1) <sup>1,3,4</sup>     | 19.2 (21.0) <sup>1,2,4</sup>     | 29.3 (27.5) <sup>1,2,3</sup>     | <0.0001         |
| Ca mg (SD)                                        | 837.2 (444.1) <sup>2,4</sup>      | 762.1 (407.8) <sup>1,3,4</sup>   | 808.4 (448.1) <sup>2,4</sup>     | 896.8 (474.8) <sup>1,2,3</sup>   | <0.0001         |
| Fe mg (SD)                                        | 10.2 (5.4) <sup>3,4</sup>         | 9.9 (5.1) <sup>3,4</sup>         | 11.4 (5.4) <sup>1,2,4</sup>      | 14.3 (6.1) <sup>1,2,3</sup>      | <0.0001         |
| Zn mg (SD)                                        | 6.2 (3.0) <sup>3,4</sup>          | 6.2 (3.0) <sup>3,4</sup>         | 7.2 (3.3) <sup>1,2,4</sup>       | 9.2 (3.8) <sup>1,2,3</sup>       | <0.0001         |
| Vit C mg(SD)                                      | 77.8 (96.2) <sup>2,3</sup>        | 61.8 (80.2) <sup>1,4</sup>       | 66.3 (74.5) <sup>1,4</sup>       | 77.5 (82.3) <sup>2,3</sup>       | <0.0001         |
| Vit A                                             | 3600.3 (4593.7) <sup>2,3</sup>    | 2961.0 (3604.7) <sup>1,4</sup>   | 2922.1 (3594.3) <sup>1,4</sup>   | 3351.3 (3642.3) <sup>2,3</sup>   | <0.0001         |
| Folate                                            | 201.9 (118.8) <sup>3,4</sup>      | 197.0 (111.4) <sup>3,4</sup>     | 218.6 (118.5) <sup>1,2,4</sup>   | 257.0 (132.9) <sup>1,2,3</sup>   | <0.0001         |
| Vit B12                                           | 1.3 (1.5) <sup>2,3,4</sup>        | 1.6 (1.5) <sup>1,3,4</sup>       | 2.0 (1.7) <sup>1,2,4</sup>       | 3.0 (2.0) <sup>1,2,3</sup>       | <0.0001         |
| <b>Plant-based</b>                                |                                   |                                  |                                  |                                  |                 |
| EI:BMR ratio (SD)                                 | 0.75 (0.30) <sup>2,3,4</sup>      | 0.85 (0.33) <sup>1,3,4</sup>     | 0.99 (0.35) <sup>1,2,4</sup>     | 1.31 (0.41) <sup>1,2,3</sup>     | <0.0001         |
| Energy kcal (SD)                                  | 1423.2 (589.0) <sup>2,3,4</sup>   | 1581.0 (608.9) <sup>1,3,4</sup>  | 1846.3 (656.1) <sup>1,2,4</sup>  | 2448.2 (796.0) <sup>1,2,3</sup>  | <0.0001         |
| Protein % (SD)                                    | 11.6 (2.5) <sup>2,3,4</sup>       | 11.3 (2.2) <sup>1,3,4</sup>      | 11.1 (2.2) <sup>1,2,4</sup>      | 10.9 (2.2) <sup>1,2,3</sup>      | <0.0001         |
| Fat % (SD)                                        | 27.4 (8.4) <sup>2,3,4</sup>       | 26.0 (7.8) <sup>1,3,4</sup>      | 26.2 (7.7) <sup>1,2,4</sup>      | 26.5 (7.1) <sup>1,2,3</sup>      | <0.0001         |
| Carbohydrates % (SD)                              | 60.9(9.9) <sup>2,3,4</sup>        | 62.5 (8.9) <sup>1,3,4</sup>      | 62.1 (8.8) <sup>1,2,4</sup>      | 62.5 (8.2) <sup>1,2,3</sup>      | <0.0001         |
| Fiber g (SD)                                      | 15.8 (8.6) <sup>2,3,4</sup>       | 18.1 (9.2) <sup>1,3,4</sup>      | 21.0 (9.7) <sup>1,2,4</sup>      | 28.1 (11.7) <sup>1,2,3</sup>     | <0.0001         |
| Sugar g (SD)                                      | 9.2 (19.5) <sup>2,3,4</sup>       | 13.7 (20.5) <sup>1,3,4</sup>     | 17.2 (21.3) <sup>1,2,4</sup>     | 24.6 (24.2) <sup>1,2,3</sup>     | <0.0001         |
| Ca mg (SD)                                        | 643.5 (356.7) <sup>2,3,4</sup>    | 744.2 (382.2) <sup>1,3,4</sup>   | 852.8 (411.0) <sup>1,2,4</sup>   | 1122.3 (485.2) <sup>1,2,3</sup>  | <0.0001         |
| Fe mg (SD)                                        | 9.5 (4.8) <sup>2,3,4</sup>        | 10.0 (5.0) <sup>1,3,4</sup>      | 11.6 (5.2) <sup>1,2,4</sup>      | 15.2 (6.2) <sup>1,2,3</sup>      | <0.0001         |
| Zn mg (SD)                                        | 5.9 (2.8) <sup>2,3,4</sup>        | 6.4 (2.9) <sup>1,3,4</sup>       | 7.2 (3.2) <sup>1,2,4</sup>       | 9.6 (3.8) <sup>1,2,3</sup>       | <0.0001         |
| Vit C mg (SD)                                     | 35.9 (45.9) <sup>2,3,4</sup>      | 54.5 (51.2) <sup>1,3,4</sup>     | 79.8 (69.4) <sup>1,2,4,2,4</sup> | 147.3 (104.2) <sup>1,2,3</sup>   | <0.0001         |
| Vit A                                             | 1719.7 (1874.3) <sup>2,3,4</sup>  | 2500.5 (2606.6) <sup>1,3,4</sup> | 3667.1 (3283.1) <sup>1,2,4</sup> | 6309.7 (4908.1) <sup>1,2,3</sup> | <0.0001         |
| Folate                                            | 178.3 (107.8) <sup>2,3,4</sup>    | 191.0 (102.8) <sup>1,3,4</sup>   | 218.3 (110.9) <sup>1,2,4</sup>   | 296.3 (130.7) <sup>1,2,3</sup>   | <0.0001         |
| Vit B12)                                          | 1.6 (1.5) <sup>3,4</sup>          | 1.7 (1.5) <sup>3,4</sup>         | 2.0 (1.8) <sup>1,2,4</sup>       | 1.9 (1.8) <sup>1,2,3</sup>       | <0.0001         |
| <b>Protein-rich</b>                               |                                   |                                  |                                  |                                  |                 |
| EI:BMR ratio                                      | 0.83 (0.36) <sup>2,3,4</sup>      | 0.88 (0.37) <sup>1,3,4</sup>     | 0.97 (0.39) <sup>1,2,4</sup>     | 1.17 (0.42) <sup>1,2,3</sup>     | <0.0001         |
| Energy kcal (SD)                                  | 1434.2 (662.0) <sup>2,3,4</sup>   | 1637.2 (688.2) <sup>1,3,4</sup>  | 1805.05 (736.4) <sup>1,2,4</sup> | 2226.1 (803.3) <sup>1,2,3</sup>  | <0.0001         |
| Protein % (SD)                                    | 10.3 (2.2) <sup>2,3,4</sup>       | 11.0 (2.2) <sup>1,3,4</sup>      | 11.5 (2.1) <sup>1,2,4</sup>      | 12.0 (2.2) <sup>1,2,3</sup>      | <0.0001         |
| Fat % (SD)                                        | 25.3 (8.2) <sup>3,4</sup>         | 25.4 (7.7) <sup>3,4</sup>        | 27.0 (7.5) <sup>1,2,4</sup>      | 28.1 (7.3) <sup>1,2,3</sup>      | <0.0001         |
| Carbohydrates % (SD)                              | 64.1 (9.2) <sup>2,3,4</sup>       | 63.5 (8.8) <sup>1,3,4</sup>      | 61.4 (8.6) <sup>1,2,4</sup>      | 59.7 (8.6) <sup>1,2,3</sup>      | <0.0001         |
| Fiber g (SD)                                      | 15.9 (8.7) <sup>2,3,4</sup>       | 18.5 (9.1) <sup>1,3,4</sup>      | 21.2 (10.3) <sup>1,2,4</sup>     | 27.0 (11.0) <sup>1,2,3</sup>     | <0.0001         |
| Sugar g (SD)                                      | 18.1 (23.1) <sup>2,3</sup>        | 14.2 (20.5) <sup>4,1</sup>       | 15.5 (22.1) <sup>4,1</sup>       | 17.2 (22.3) <sup>2,3</sup>       | <0.0001         |
| Ca mg (SD)                                        | 726.1 (402.2) <sup>2,3,4</sup>    | 769.3 (427.9) <sup>1,3,4</sup>   | 834.1 (440.7) <sup>1,2,4</sup>   | 973.5 (476.5) <sup>1,2,3</sup>   | <0.0001         |
| Fe mg (SD)                                        | 9.3 (5.0) <sup>2,3,4</sup>        | 10.3 (5.0) <sup>1,3,4</sup>      | 11.9 (5.3) <sup>1,2,4</sup>      | 14.8 (6.2) <sup>1,2,3</sup>      | <0.0001         |
| Zn mg (SD)                                        | 5.7 (2.9) <sup>2,3,4</sup>        | 6.5 (2.9) <sup>1,3,4</sup>       | 7.4 (3.3) <sup>1,2,4</sup>       | 9.5 (3.8) <sup>1,2,3</sup>       | <0.0001         |
| Vit C mg (SD)                                     | 56.1 (73.9) <sup>2,3,4</sup>      | 64.4 (78.5) <sup>1,3,4</sup>     | 76.7 (83.8) <sup>1,2,4</sup>     | 85.6 (95.0) <sup>1,2,3</sup>     | <0.0001         |
| Vit A                                             | 2257.0 (3323.2) <sup>2,3,4</sup>  | 2773.0 (3267.6) <sup>1,3,4</sup> | 3522.7 (3536.8) <sup>1,2,4</sup> | 4444.3 (4796.2) <sup>1,2,3</sup> | <0.0001         |
| Folate                                            | 157.3 (88.7) <sup>2,3,4</sup>     | 190.6 (95.4) <sup>1,3,4</sup>    | 229.6 (106.9) <sup>1,2,4</sup>   | 308.3 (133.4) <sup>1,2,3</sup>   | <0.0001         |
| Vit B12                                           | 1.5 (1.5) <sup>2,3,4</sup>        | 1.7 (1.6) <sup>1,3,4</sup>       | 2.0 (1.8) <sup>1,2,4</sup>       | 2.6 (2.1) <sup>1,2,3</sup>       | <0.0001         |

Q-quartile; median, SD- standard deviation; <sup>1,2,3,4</sup> indicate statistically significant results between quartiles (p-value ,0.05)
